# Supplementary material for: Ramadan fasting in Saudi Arabia is associated with altered expression of CLOCK, DUSP and IL-1alpha genes, as well as changes in cardiometabolic risk factors
Source: PubMed Central journal article supplement (PMC5401765; doi:10.1371/journal.pone.0174342), 2017-04-06
Supplement: pone.0174342.s001.pdf [file pone.0174342.s001.pdf]

S1 Biochemical Data

| S_N | S_UHDL_A<br>M | S_Chol_<br>AM | S_Trig_AM | LDL_S_A<br>M | S-LDL/HDL-<br>AM | S-AI-AM | R_UHDL_A<br>M | R_Chol_A<br>M | R_Trig_AM | LDL_R_A<br>M | R-LDL/HDL | R-AI-AM | S-GGT-<br>AM | S-CRPhs-<br>AM | S-CRPhs-<br>PM | R-GGT-AM | R-CRPhs-<br>AM | R-CRPhs-<br>PM | S-Adipo-AM | S-Adipo-<br>PM | R-Adipo-<br>AM | R-Adipo-<br>PM |
|-----|---------------|---------------|-----------|--------------|------------------|---------|---------------|---------------|-----------|--------------|-----------|---------|--------------|----------------|----------------|----------|----------------|----------------|------------|----------------|----------------|----------------|
| S01 | 1.39          | 4.49          | 0.62      | 2.82         | 2.03             | -0.35   | 1.19          | 4.14          | 0.57      | 2.76         | 2.32      | -0.32   | 27           | 0.4            | 0.28           | 22       | 0.77           | 0.76           | 10.509     | 7.551          | 9.885          | 9.816          |
| S02 | 1.13          | 4.49          | 0.61      | 3.08         | 2.73             | -0.27   | 0.92          | 4.81          | 2.84      | 3.59         | 3.90      | 0.49    | 23           | 1.12           | 1.0            | 17       | 1.95           | 1.91           | 9.84       | 6.15           | 6.408          | 6.942          |
| S03 | 1.17          | 4.50          | 0.89      | 2.92         | 2.50             | -0.12   | 1.12          | 4.82          | 0.85      | 3.42         | 3.05      | -0.12   | 11           |                |                | 10       | 0.4            | 0.34           | 15.747     | 12.69          | 10.152         | 11.22          |
| S04 | 1.29          | 4.46          | 0.71      | 2.85         | 2.21             | -0.26   | 1.13          | 4.35          | 1.05      | 2.62         | 2.32      | -0.03   | 31           | 0.28           | 0.21           | 25       | 0.57           | 0.39           | 2.958      | 14.556         | 9.282          | 7.677          |
| S05 | 0.83          | 3.54          | 0.43      | 2.51         | 3.03             | -0.29   | 0.87          | 3.57          | 0.99      | 2.25         | 2.59      | 0.06    | 63           | 2.31           | 1.88           | 11       | 0.83           | 0.65           | 16.581     | 12.144         | 8.013          | 3.669          |
| S06 | 1.33          | 4.49          | 0.76      | 2.81         | 2.12             | -0.24   | 1.36          | 4.75          | 1.25      | 2.60         | 1.91      | -0.04   | 28           | 4.02           | 3.61           | 23       | 2.04           | 5.24           | 10.665     | 8.409          | 8.682          | 8.547          |
| S07 | 1.10          | 6.59          | 0.52      | 5.25         | 4.78             | -0.33   | 1.07          | 6.35          | 1.30      | 5.14         | 4.80      | 0.08    | 28           | 2.7            | 1.46           | 31       | 1.82           | 1.09           | 10.041     | 6.228          | 9.348          | 5.406          |
| S08 | 0.94          | 4.42          | 2.72      | 2.24         | 2.38             | 0.46    | 1.04          | 5.23          | 1.80      | 3.08         | 2.96      | 0.24    | 27           |                |                | 24       | 0.1            | 0.13           | 8.952      | 7.161          | 3.801          | 7.479          |
| S09 | 1.06          | 4.16          | 0.61      | 2.82         | 2.66             | -0.24   | 0.98          | 4.18          | 1.21      | 2.79         | 2.84      | 0.09    | 27           | 9.55           | 6.12           | 26       | 2.28           | 4.28           | 14.325     | 6.852          | 9.348          | 9.348          |
| S10 | 1.42          | 4.23          | 0.88      | 2.41         | 1.70             | -0.21   | 1.17          | 4.74          | 1.06      | 2.87         | 2.45      | -0.04   | 20           | 0.43           | 0.6            | 16       | 0.52           | 0.49           | 12.222     | 6.618          | 10.086         | 10.752         |
| S11 | 1.17          | 3.57          | 0.57      | 2.14         | 1.83             | -0.31   | 1.10          | 3.40          | 0.66      | 1.83         | 1.66      | -0.22   | 32           | 0.57           | 0.6            | 29       | 0.53           | 0.4            | 14.169     | 12.144         | 12.291         | 16.434         |
| S12 | 1.14          | 6.09          | 1.08      | 4.46         | 3.91             | -0.02   | 0.85          | 4.48          | 1.48      | 3.40         | 4.00      | 0.24    | 19           | 0.46           | 0.49           | 13       | 0.16           | 0.24           | 14.4       | 6.54           | 3.669          | 8.346          |
| S13 | 1.07          | 3.56          | 0.60      | 2.22         | 2.07             | -0.25   | 1.04          | 3.84          | 0.77      | 4.08         | 3.92      | -0.13   | 18           | 1.4            | 0.87           | 18       | 1.29           | 0.99           | 16.176     | 15.957         | 10.887         | 14.094         |
| S14 | 1.71          | 6.17          | 1.45      | 3.80         | 2.22             | -0.07   | 1.44          | 5.63          | 1.50      | 3.56         | 2.47      | 0.02    | 17           | 0.64           | 0.4            | 15       | 0.41           | 0.41           | 7.068      | 4.593          | 5.538          | 5.94           |
| S15 | 1.34          | 3.87          | 0.53      | 2.29         | 1.71             | -0.40   | 1.17          | 3.86          | 0.82      | 2.39         | 2.04      | -0.15   | 13           | 0.97           | 0.82           | 12       | 0.33           | 0.27           | 10.431     | 10.026         | 8.883          | 11.154         |
| S16 | 1.21          | 4.56          | 0.90      | 2.94         | 2.43             | -0.13   | 1.00          | 4.26          | 1.32      | 2.84         | 2.84      | 0.12    | 26           | 0.61           | 0.58           | 11       | 0.59           | 0.43           | 14.868     | 9.459          | 11.355         | 9.549          |
| S17 | 0.99          | 4.29          | 0.71      | 2.98         | 3.01             | -0.14   | 1.01          | 4.74          | 1.34      | 2.69         | 2.67      | 0.12    | 21           | 1.4            | 1.19           | 20       | 2.06           | 2.22           | 10.353     | 5.451          | 8.415          | 9.282          |
| S18 | 1.38          | 5.54          | 0.70      | 3.84         | 2.78             | -0.29   | 1.37          | 5.62          | 0.55      | 4.04         | 2.95      | -0.40   | 20           | 0.3            | 0.23           | 17       |                |                | 19.539     | 11.055         | 12.891         | 17.238         |
| S19 | 0.79          | 3.03          | 0.60      | 1.97         | 2.49             | -0.12   | 0.86          | 3.73          | 1.33      | 2.55         | 2.96      | 0.19    | 17           | 2.16           | 2.51           | 14       | 0.46           | 0.53           | 9.42       | 5.295          | 9.75           | 11.622         |
| S21 | 1.14          | 5.53          | 2.19      | 3.39         | 2.97             | 0.28    | 1.05          | 5.12          | 2.09      | 3.11         | 2.96      | 0.30    | 94           | 3.83           | 3.5            | 92       | 3.13           | 2.91           | 5.769      | 5.046          | 3.936          | 0.795          |
| S22 | 1.09          | 3.97          | 0.60      | 2.61         | 2.39             | -0.26   | 1.03          | 3.60          | 1.19      | 2.37         | 2.30      | 0.06    | 12           | 0.43           | 0.36           | 10       | 0.16           | 0.21           | 11.754     | 7.356          | 8.883          | 9.216          |
| S23 | 1.45          | 4.55          | 0.38      | 2.93         | 2.02             | -0.58   | 1.20          | 4.11          | 0.58      | 2.83         | 2.36      | -0.32   | 11           | 1.71           | 1.02           | 9        | 0.71           | 0.6            | 13.389     | 10.353         | 13.494         | 11.556         |
| S24 | 1.54          | 3.85          | 0.43      | 2.11         | 1.37             | -0.55   | 1.35          | 4.42          | 1.30      | 2.29         | 1.70      | -0.02   | 51           | 0.17           | 0.2            | 62       | 0.4            | 0.33           | 8.097      | 6.306          | 7.41           | 7.344          |
