# Supplementary material for: Ramadan fasting in Saudi Arabia is associated with altered expression of CLOCK, DUSP and IL-1alpha genes, as well as changes in cardiometabolic risk factors
Source: PubMed Central journal article supplement (PMC5401765; doi:10.1371/journal.pone.0174342), 2017-04-06
Supplement: pone.0174342.s002.pdf [file pone.0174342.s002.pdf]

S2 QPCR Data

|     | SHAM_IL_delt<br>a_ct | SHPM_IL_delta<br>_ct | RMAM_IL1_del<br>ta_ct | RMPM_IL1_de<br>lta_ct | SHAM_CLOCK_<br>delta_ct | SHPM_CLOCK_<br>delta_ct | RMAM_CLOCK_<br>_delta_ct | RMPM_CLOCK_<br>_delta_ct | SHAM_DUSP_d<br>elta_ct | SHPM_DUSP_d<br>elta_ct |
|-----|----------------------|----------------------|-----------------------|-----------------------|-------------------------|-------------------------|--------------------------|--------------------------|------------------------|------------------------|
| S01 | 1.5                  | 0.03621401           | 0.024568346           | 0.000616182           | 1.25845497              | 0.006822643             | 0.07206909               | 0.033343509              | 2.005879954            | 2.08                   |
| S02 | 1.520057582          | 0.004059386          | 0.110582024           | 0.007574228           | 0.619857718             | 0.057548051             | 0.037832657              | 0.04521256               | 17.58977381            | 1.654376243            |
| S03 | 10.71807636          | 0.002501875          | 0.002598553           | 0.014187972           | 1.121691634             | 0.021345745             | 0.007892114              | 0.177499872              | 9.163144326            | 0.804615627            |
| S04 | 0.958294778          | 0.011002656          | 0.015552825           | 0.029974161           | 0.145641106             | 0.116831723             | 0.02223676               | 0.039154894              | 2.620723332            | 1.814920903            |
| S05 | 13.37531399          | 0.001860213          | 0.001772954           | 0.007213468           | 0.105216884             | 0.01386901              | 0.008328882              | 0.036406041              | 2.68                   | 0.836915189            |
| S06 | 10.5368698           | 0.010422822          | 0.09675473            | 0.012837117           | 0.054927014             | 0.084182192             | 0.036247553              | 0.077783452              | 1.761076705            | 0.285592869            |
| S07 | 12.60143542          | 0.009235193          | 0.077949502           | 0.040677575           | 0.7177119               | 0.039246523             | 0.060992798              | 0.083010254              | 0.104595124            | 0.943380064            |
| S08 | 0.43602834           | 0.011750588          | 0.125193006           | 0.030456309           | 0.038079092             | 0.017166643             | 0.010114669              | 0.093168304              | 7.920920966            | 1.6647338              |
| S09 | 2.99646898           | 0.004175059          | 0.147089289           | 0.0386418             | 0.271485316             | 0.088632914             | 0.016449704              | 0.068389519              | 14.13921851            | 0.043671785            |
| S10 | 1.32                 | 0.03681401           | 0.103696849           | 0.023279328           | 1.4237982               | 0.03                    | 0.03345633               | 0.065977126              | 1.32184551             | 0.033343509            |
| S11 | 1.54                 | 0.04059386           | 0.156789              | 0.002598553           | 1.25275497              | 0.02134021              | 0.006822643              | 0.116831723              | 4.892917846            | 0.04521256             |
| S12 | 1.68                 | 0.039015             | 0.16888312            | 0.015552825           | 0.3247553               | 0.1175467               | 0.027548051              | 0.01386901               | 16.353875              | 0.177499872            |
| S13 | 14.88                | 0.003200266          | 0.1800865             | 0.001772954           | 0.60992798              | 0.01386901              | 0.021345745              | 0.184182192              | 15.2613708             | 0.285592869            |
| S14 | 1.3                  | 0.003826021          | 0.1                   | 0.009675473           | 0.64114669              | 0.078316218             | 0.030456309              | 0.039246523              | 15.4421021             | 0.943380064            |
| S15 | 14.2                 | 0.010422822          | 0.007853302           | 0.027949502           | 0.316316884             | 0.039246523             | 0.0396418                | 0.17166643               | 1.376012               | 1.6647338              |
| S16 | 3.2                  | 0.003523519          | 0.03658               | 0.012519301           | 0.054927014             | 0.006822643             | 0.023279328              | 0.098632914              | 1.642376243            | 0.043671785            |
| S17 | 10.89                | 0.003975088          | 0.02                  | 0.014452211           | 0.7177119               | 0.057548051             | 0.009892114              | 0.03                     | 12.84615627            | 1.285592869            |
| S18 | 11.73                | 0.00123438           | 0.1                   | 0.020324685           | 0.028079092             | 0.021345745             | 0.04323676               | 0.037548051              | 13.5149209             | 1.543380064            |
| S19 | 12.22                | 0.001106234          | 0.01776321            | 0.017322              | 0.271485316             | 0.077783452             | 0.008328882              | 0.021345745              | 2.636915189            | 1.647338               |
| S21 | 15.4567889           | 0.004218001          | 0.00003589            | 0.0175088             | 1.5087982               | 0.083010254             | 0.046247553              | 0.042783452              | 1.285592869            | 0.043671785            |
| S22 | 0.32527897           | 0.00085032           | 0.015552825           | 0.00013438            | 0.607853218             | 0.073168304             | 0.074892698              | 0.121010254              | 1.9380064              | 2.438087982            |
| S23 | 0.8789896            | 0.00435193           | 0.01772954            | 0.01106234            | 1.123491634             | 0.007892114             | 0.013214669              | 0.0521304                | 1.67338                | 3.24775497             |
| S24 | 0.23456878           | 0.009335193          | 0.09675473            | 0.0421001             | 0.1541106               | 0.02223676              | 0.05427014               | 0.00782114               | 0.013671785            | 2.35547553             |

| RMAM_DUSP_<br>delta_ct | RMPM_DUSP_d<br>elta_ct |
|------------------------|------------------------|
| 1.038443252            | 23.46314167            |
| 73.02116431            | 10.97801591            |
| 50.90377907            | 25.98283113            |
| 70.26774779            | 16.70241855            |
| 66.82442174            | 23.76607879            |
| 1.212381275            | 2.369884551            |
| 60.85088072            | 0.892917846            |
| 44.13105186            | 1.499593875            |
| 40.0972928             | 0.261370801            |
| 1.0443252              | 6.369884551            |
| 71.0211631             | 0.982917846            |
| 50.05779071            | 1.99593875             |
| 71.76779               | 0.361370801            |
| 66.2542174             | 2.499593875            |
| 1.212381275            | 0.34370801             |
| 73.2116431             | 20.283113              |
| 52.3779071             | 21.70341855            |
| 61.26774779            | 27.07607879            |
| 72.2342174             | 4.369884551            |
| 1.056                  | 10.7801591             |
| 54.11310519            | 27.28389               |
| 1.456789963            | 15.241855              |
| 58.13105186            | 25.4668979             |
